# Supplementary material for: Facile template-free synthesis of porous g-C3N4 with high photocatalytic performance under visible light
Source: Royal Society of Chemistry journal article supplement (doi:10.1039/c3ra40765a), 2013-01-01
Supplement: c3ra40765a.pdf [file c3ra40765a.pdf]

## Electronic Supplementary Information (ESI)

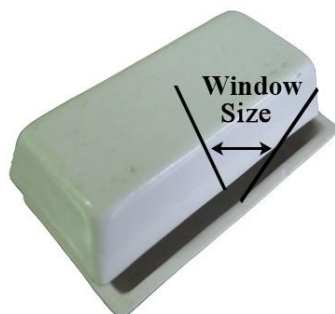

**Scheme S1.** Schematic illustration of the semi-closed system used for preparation of g-C<sub>3</sub>N<sub>4</sub> sample.

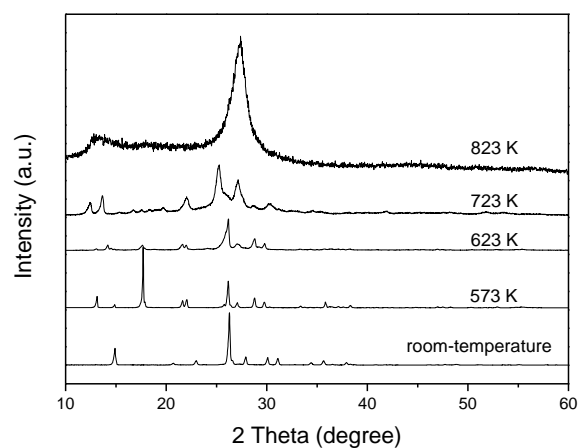

**Fig. S1** Wide-angle XRD patterns of dicyandiamide calcined at different temperatures, which are attributed to melamine, melem and melon at 573K, 623K and 723K, respectively.

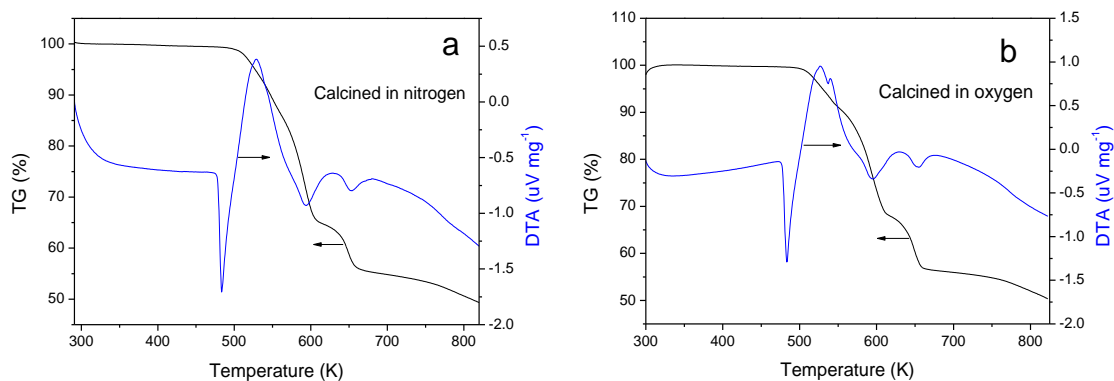

**Fig. S2** TG-DTA of dicyandiamide calcined in different atmospheres with a heating rate of 10 K min<sup>-1</sup>.

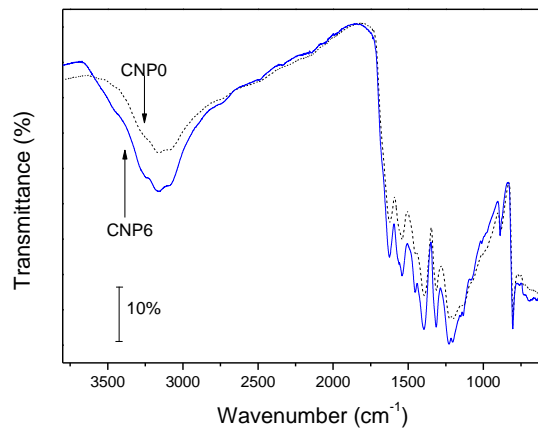

**Fig. S3** FT-IR spectra of CNP0 and CNP6 samples.

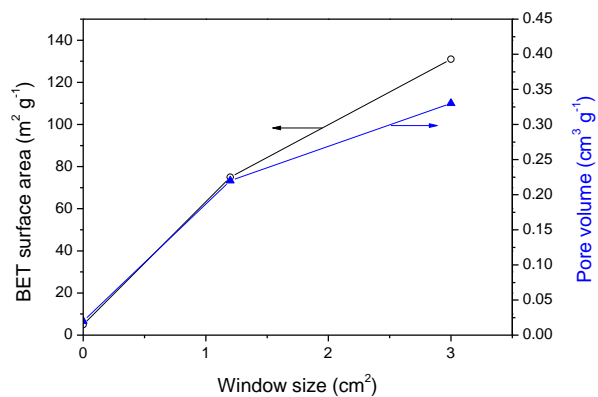

**Fig. S4** The BET surface area and pore volume of porous g-C<sub>3</sub>N<sub>4</sub> obtained from melamine via window size, and the synthesis process is same as that of CNP $n$  samples.

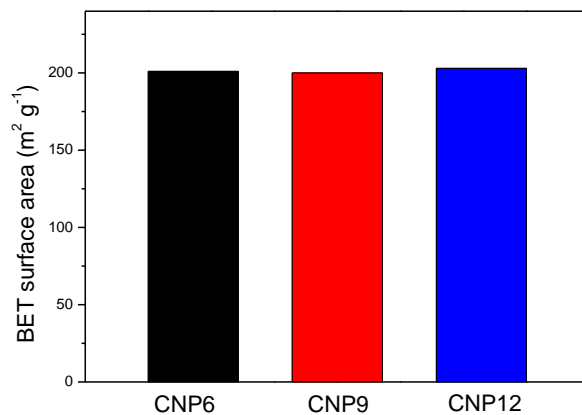

**Fig. S5** The BET surface areas of CNP6, CNP9 and CNP12 samples.
